# Supplementary material for: In silico capture of noble gas atoms with a light atom molecule
Source: Royal Society of Chemistry journal article supplement (doi:10.1039/d2cp02517e), 2022-01-01
Supplement: d2cp02517e2.pdf [file d2cp02517e2.pdf]

***In Silico* Capture of Noble Gas Atoms with a Light Atom Molecule**

Stefan Mebs,<sup>1\*</sup> Jens Beckmann<sup>2</sup>

<sup>1</sup> *Institut für Experimentalphysik, Freie Universität Berlin, Arnimallee 14, 14195 Berlin,  
Germany*

<sup>2</sup> *Institut für Anorganische Chemie und Kristallographie, Universität Bremen,  
Leobener Straße 7, 28359 Bremen, Germany*

**Supporting Information**

The following two tables, S1 and S2, require explanations about the used color-code. The realization of this project was connected with enormous computational efforts; a rough estimate of the 55 DFT-relaxed structures (each with more than 120 atoms) as well as numerous additional calculations presented here yields about 500.000 h of computational time with state-of-the-art processors (not to mention the roughly same number of structures not presented here). Some of those structures converged fast, others converged almost and stayed in this status for 20-30 optimization cycles without further changing the overall energy in a significant fashion ( $\pm 0.5$  kJ mol<sup>-1</sup>). Since all but one ligand systems are not capable to energy efficiently capture Ng atoms, it was decided to stop those cases after two weeks with 20 processors each, which tend to remain in this volatile state. The best performer, [(5-Ph<sub>2</sub>B-xan-4-)<sub>3</sub>Si·Ng]<sup>+</sup>, was fully converged. Due to the same reasons, the calculations were conducted at the b3pw91-D3/6-31+G\* level of theory, and only for the best performer, additional single-point calculations were done at the b3pw91-D3/6-311+G(2df,p) level of theory using the b3pw91-D3/6-31+G\* optimized coordinated. Basis-set superposition errors are known to give wrong (too strong) adduct formation energies. In order to compensate for that, BSSE correction was conducted explicitly using the counterpoise method for the best performer at both levels of theory, and the energetic add-on extracted from those corrections was applied to all other adduct structures as an estimate. The mentioned limitations and methods result in the following color code:

Light green highlighted absolute energies: full convergence achieved

Light orange highlighted absolute energies: almost full convergence achieved

Yellow highlighted absolute energies: Single-point calculations

Blue highlighted absolute energies: BSSE-correction

Green highlighted relative energies:  $\Delta E < 0$  – model is favorable

Orange highlighted relative energies:  $\Delta E > 0$  – model is unfavorable

Red colored numbers: BSSE add-on applied to all adduct structures

Bold formatted relative energies: Final results as listed in Table 1.

§ Calculations at b3pw91-D3/6-311+G(2df,p)

**Table S1.** Absolute and relative energies of  $[(R_2E\text{-}spacer)_3Si\cdot Ng]^+$ 

| <i>spacer</i> | E  | R                             | state    | E<br>(a.u.) | LS+Ng<br>(a.u.) | $\Delta E$<br>(a.u.) | $\Delta E$<br>(kJ mol <sup>-1</sup> ) | BSSE<br>(kJ mol <sup>-1</sup> ) | $\Delta E_{\text{corr}}$<br>(kJ mol <sup>-1</sup> ) |
|---------------|----|-------------------------------|----------|-------------|-----------------|----------------------|---------------------------------------|---------------------------------|-----------------------------------------------------|
| <i>ace</i>    | B  | C <sub>6</sub> F <sub>5</sub> | start    | -6116.2702  |                 | -0.0132              | <b>-34.8</b>                          |                                 |                                                     |
| <i>ace</i>    | B  | C <sub>6</sub> F <sub>5</sub> | dead-end | -6116.2570  |                 |                      |                                       |                                 |                                                     |
| <i>ace</i>    | B  | C <sub>6</sub> F <sub>5</sub> | active   | -6115.4058  |                 |                      |                                       |                                 |                                                     |
| <i>ace</i>    | B  | C <sub>6</sub> F <sub>5</sub> | He       | -6118.2894  | -6118.3075      | 0.0181               | 47.6                                  | 4.5                             | <b>52.1</b>                                         |
| <i>ace</i>    | B  | Ph                            | start    | -3140.3279  |                 | -0.0082              | <b>-21.4</b>                          |                                 |                                                     |
| <i>ace</i>    | B  | Ph                            | dead-end | -3140.3198  |                 |                      |                                       |                                 |                                                     |
| <i>ace</i>    | B  | Ph                            | active   | -3139.4832  |                 |                      |                                       |                                 |                                                     |
| <i>ace</i>    | B  | Ph                            | He       | -3142.3745  | -3142.3849      | 0.0104               | 27.3                                  | 4.5                             | <b>31.8</b>                                         |
| <i>ace</i>    | Ga | C <sub>6</sub> F <sub>5</sub> | start    | -11810.6579 |                 | 0.0320               | <b>83.9</b>                           |                                 |                                                     |
| <i>ace</i>    | Ga | C <sub>6</sub> F <sub>5</sub> | dead-end | -11810.6899 |                 |                      |                                       |                                 |                                                     |
| <i>ace</i>    | Ga | C <sub>6</sub> F <sub>5</sub> | active   | -11809.7906 |                 |                      |                                       |                                 |                                                     |
| <i>ace</i>    | Ga | C <sub>6</sub> F <sub>5</sub> | He       | -11812.6825 | -11812.6923     | 0.0098               | 25.6                                  | 4.5                             | <b>30.1</b>                                         |
| <i>bip</i>    | B  | Ph                            | start    | -3136.4596  |                 | -0.0027              | <b>-7.1</b>                           |                                 |                                                     |
| <i>bip</i>    | B  | Ph                            | dead-end | -3136.4569  |                 |                      |                                       |                                 |                                                     |
| <i>bip</i>    | B  | Ph                            | active   | -3135.6106  |                 |                      |                                       |                                 |                                                     |
| <i>bip</i>    | B  | Ph                            | He       | -3138.5090  | -3138.5123      | 0.0033               | 8.7                                   | 4.5                             | <b>13.2</b>                                         |
| <i>bip</i>    | Ga | C <sub>6</sub> F <sub>5</sub> | start    | -11806.7610 |                 | 0.0202               | <b>53.2</b>                           |                                 |                                                     |
| <i>bip</i>    | Ga | C <sub>6</sub> F <sub>5</sub> | dead-end | -11806.7813 |                 |                      |                                       |                                 |                                                     |
| <i>bip</i>    | Ga | C <sub>6</sub> F <sub>5</sub> | active   | -11805.8919 |                 |                      |                                       |                                 |                                                     |
| <i>bip</i>    | Ga | C <sub>6</sub> F <sub>5</sub> | He       | -11808.7857 | -11808.7936     | 0.0079               | 20.7                                  | 4.5                             | <b>25.2</b>                                         |
| <i>bip</i>    | Ga | Ph                            | start    | -8830.7569  |                 | 0.0129               | <b>33.9</b>                           |                                 |                                                     |
| <i>bip</i>    | Ga | Ph                            | dead-end | -8830.7698  |                 |                      |                                       |                                 |                                                     |
| <i>bip</i>    | Ga | Ph                            | active   | -8829.8994  |                 |                      |                                       |                                 |                                                     |
| <i>bip</i>    | Ga | Ph                            | He       | -8832.8003  | -8832.8011      | 0.0008               | 2.0                                   | 4.5                             | <b>6.5</b>                                          |
| <i>txn</i>    | B  | C <sub>6</sub> F <sub>5</sub> | start    | -7425.0050  |                 | -0.0027              | <b>-7.0</b>                           |                                 |                                                     |
| <i>txn</i>    | B  | C <sub>6</sub> F <sub>5</sub> | dead-end | -7425.0024  |                 |                      |                                       |                                 |                                                     |
| <i>txn</i>    | B  | C <sub>6</sub> F <sub>5</sub> | active   | -7424.1460  |                 |                      |                                       |                                 |                                                     |
| <i>txn</i>    | B  | C <sub>6</sub> F <sub>5</sub> | He       | -7427.0455  | -7427.0477      | 0.0022               | 5.9                                   | 4.5                             | <b>10.4</b>                                         |
| <i>txn</i>    | B  | C <sub>6</sub> F <sub>5</sub> | Kr       | -10175.2407 | -10175.2233     | -0.0174              | -45.7                                 | 60.2                            | <b>14.5</b>                                         |
| <i>txn</i>    | Ga | C <sub>6</sub> F <sub>5</sub> | start    | -13119.3540 |                 | -0.0015              | <b>-3.9</b>                           |                                 |                                                     |
| <i>txn</i>    | Ga | C <sub>6</sub> F <sub>5</sub> | dead-end | -13119.3525 |                 |                      |                                       |                                 |                                                     |
| <i>txn</i>    | Ga | C <sub>6</sub> F <sub>5</sub> | active   | -13118.5259 |                 |                      |                                       |                                 |                                                     |
| <i>txn</i>    | Ga | C <sub>6</sub> F <sub>5</sub> | He       | -13121.4206 | -13121.4276     | 0.0070               | 18.3                                  | 4.5                             | <b>22.8</b>                                         |
| <i>txn</i>    | Ga | C <sub>6</sub> F <sub>5</sub> | Kr       | -15869.6003 | -15869.6032     | 0.0029               | 7.6                                   | 60.2                            | <b>67.8</b>                                         |

Light green: fully converged. Light orange: almost converged.

Green:  $\Delta E < 0$ . Orange:  $\Delta E > 0$ .

**Table S2.** Absolute and relative energies of [(5-Ph<sub>2</sub>B-xan-4-)<sub>3</sub>Si·Ng]<sup>+</sup> (**2d-g**)

| L    | E  | R    | state    | E (a.u.)          | LS+Ng (a.u.) | ΔE (a.u.)   | ΔE (kJ/mol) | BSSE (kJ/mol)                       | ΔE <sub>corr</sub> (kJ/mol)        |
|------|----|------|----------|-------------------|--------------|-------------|-------------|-------------------------------------|------------------------------------|
| xan  | B  | C6F5 | start    | -6456.1364        |              | -0.0127     | -33.4       |                                     |                                    |
| xan  | B  | C6F5 | dead-end | -6456.1237        |              |             |             |                                     |                                    |
| xan  | B  | C6F5 | active   | -6455.2877        |              |             |             |                                     |                                    |
| xan  | B  | C6F5 | He       | -6458.1712        | -6458.1894   | 0.0182      | 47.7        | 4.5                                 | 52.2                               |
| xan  | B  | C6F5 | Ne       | -6584.1459        | -6584.1622   | 0.0163      | 42.9        | 5.7                                 | 48.6                               |
| xan  | B  | C6F5 | Ar       | -6982.7432        | -6982.7520   | 0.0087      | 22.9        | 4.2                                 | 27.1                               |
| xan  | B  | C6F5 | Kr       | -9206.3872        | -9206.3649   | -0.0223     | -58.6       | 60.2                                | 1.6                                |
| xan  | Ga | C6F5 | start    | -12150.4941       |              | -0.0059     | -15.4       |                                     |                                    |
| xan  | Ga | C6F5 | dead-end | -12150.4882       |              |             |             |                                     |                                    |
| xan  | Ga | C6F5 | active   | -12149.6620       |              |             |             |                                     |                                    |
| xan  | Ga | C6F5 | He       | -12152.5253       | -12152.5637  | 0.0384      | 100.8       | 4.5                                 | 105.3                              |
| xan  | Ga | C6F5 | Ne       | -12278.4960       | -12278.5365  | 0.0405      | 106.4       | 5.7                                 | 112.1                              |
| xan  | Ga | C6F5 | Ar       | -12677.0937       | -12677.1263  | 0.0325      | 85.4        | 4.2                                 | 89.6                               |
| xan  | Ga | C6F5 | Kr       | -14900.7359       | -14900.7392  | 0.0033      | 8.7         | 60.2                                | 68.9                               |
| xan  | B  | Ph   | start    | -3480.1911        |              | -0.0143     | -37.5       |                                     |                                    |
| xan  | B  | Ph   | dead-end | -3480.1768        |              |             |             |                                     |                                    |
| xan  | B  | Ph   | active   | <b>-3479.3411</b> |              |             |             | BSSE add-on (kJ mol <sup>-1</sup> ) | incl. BSSE (kJ mol <sup>-1</sup> ) |
| xan  | B  | Ph   | He       | -3482.2447        | -3482.2428   | -0.0019     | -4.9        | 4.5                                 | -0.4                               |
| xan  | B  | Ph   | Ne       | -3608.2199        | -3608.2157   | -0.0042     | -11.0       | 5.7                                 | -5.3                               |
| xan  | B  | Ph   | Ar       | -4006.8188        | -4006.8054   | -0.0134     | -35.3       | 4.2                                 | -31.1                              |
| xan  | B  | Ph   | Kr       | -6230.4618        | -6230.4184   | -0.0434     | -113.9      | 60.2                                | -53.7                              |
| xan§ | B  | Ph   | start    | -3481.0317        |              | -0.0142     | -37.3       |                                     |                                    |
| xan§ | B  | Ph   | dead-end | -3481.0175        |              |             |             |                                     |                                    |
| xan§ | B  | Ph   | active   | -3480.1808        |              |             |             |                                     |                                    |
| xan§ | B  | Ph   | He       | -3483.0888        | -3483.0880   | -0.0008     | -2.2        | 1.6                                 | -0.6                               |
| xan§ | B  | Ph   | Ne       | -3609.1036        | -3609.0988   | -0.0049     | -12.8       | 7.6                                 | -5.2                               |
| xan§ | B  | Ph   | Ar       | -4007.6928        | -4007.6784   | -0.0144     | -37.8       | 2.9                                 | -34.9                              |
| xan§ | B  | Ph   | Kr       | -6233.9428        | -6233.9185   | -0.0244     | -64.0       | 5.9                                 | -58.1                              |
| L    | E  | R    | state    | "Ng"              | "LS"         | "Ng" + "LS" | adduct      | ΔE (a.u.)                           | ΔE (kJ/mol)                        |
| xan  | B  | Ph   | He       | -2.9034           | -3479.3413   | -3482.2446  | -3482.2447  | 0.0000                              | -0.1                               |
| xan  | B  | Ph   | Ne       | -128.8764         | -3479.3416   | -3608.2179  | -3608.2199  | -0.0019                             | -5.1                               |
| xan  | B  | Ph   | Ar       | -527.4653         | -3479.3416   | -4006.8069  | -4006.8188  | -0.0119                             | -31.4                              |
| xan  | B  | Ph   | Kr       | -2751.0992        | -3479.3409   | -6230.4401  | -6230.4618  | -0.0217                             | -56.9                              |
| xan§ | B  | Ph   | He       | -2.9077           | -3480.1809   | -3483.0886  | -3483.0888  | -0.0002                             | -0.6                               |
| xan§ | B  | Ph   | Ne       | -128.9206         | -3480.1810   | -3609.1017  | -3609.1036  | -0.0020                             | -5.2                               |
| xan§ | B  | Ph   | Ar       | -527.4983         | -3480.1811   | -4007.6794  | -4007.6928  | -0.0134                             | -35.2                              |
| xan§ | B  | Ph   | Kr       | -2753.7394        | -3480.1802   | -6233.9196  | -6233.9428  | -0.0233                             | -61.1                              |
|      |    |      |          | Ng(gas)           | Ng(gas)§     |             | LS-opt-Ng   |                                     |                                    |
|      |    |      | He       | -2.9017           | -2.9072      |             | -3479.3412  | -0.0001                             | -0.3                               |
|      |    |      | Ne       | -128.8745         | -128.9180    |             | -3479.3412  | -0.0001                             | -0.2                               |
|      |    |      | Ar       | -527.4643         | -527.4976    |             | -3479.3410  | 0.0001                              | 0.3                                |
|      |    |      | Kr       | -2751.0772        | -2753.7376   |             | -3479.3399  | 0.0012                              | 3.2                                |

Yellow: single-point calculations. Blue: BSSE calculations. § 6-311+G(2df,p) basis set.

**Table S3.** Thermodynamic properties of [(5-Ph<sub>2</sub>B-xan-4-)<sub>3</sub>Si·Ng]<sup>+</sup> (**2d-g**)

| model            | empty active                                 | small (a.u.) |           |           |                                        | small + empty (a.u.) |            |              |           |
|------------------|----------------------------------------------|--------------|-----------|-----------|----------------------------------------|----------------------|------------|--------------|-----------|
|                  |                                              | He           | Ne        | Ar        | Kr                                     | He                   | Ne         | Ar           | Kr        |
| E                | -3479.341                                    | -2.902       | -128.875  | -527.464  | -2751.077                              | -3482.243            | -3608.216  | -4006.805    | -6230.418 |
| ZPE-corr (H/n)   | 1.086                                        | 0.000        | 0.000     | 0.000     | 0.000                                  | 1.086                | 1.086      | 1.086        | 1.086     |
| TD-E corr        | 1.152                                        | 0.001        | 0.001     | 0.001     | 0.001                                  | 1.153                | 1.153      | 1.153        | 1.153     |
| TD-H corr        | 1.153                                        | 0.002        | 0.002     | 0.002     | 0.002                                  | 1.155                | 1.155      | 1.155        | 1.155     |
| TD-G corr        | 0.983                                        | -0.012       | -0.014    | -0.015    | -0.016                                 | 0.971                | 0.969      | 0.968        | 0.967     |
| E+ZPE            | -3478.255                                    | -2.902       | -128.875  | -527.464  | -2751.077                              | -3481.156            | -3607.129  | -4005.719    | -6229.332 |
| E+TD-E           | -3478.189                                    | -2.900       | -128.873  | -527.463  | -2751.076                              | -3481.090            | -3607.063  | -4005.652    | -6229.265 |
| E+TD-H           | -3478.188                                    | -2.899       | -128.872  | -527.462  | -2751.075                              | -3481.088            | -3607.061  | -4005.650    | -6229.263 |
| E+TD-G           | -3478.358                                    | -2.914       | -128.889  | -527.479  | -2751.093                              | -3481.271            | -3607.247  | -4005.837    | -6229.451 |
| E-TD (Kcal/mol)  | 722.665                                      | 0.889        | 0.889     | 0.889     | 0.889                                  | 723.554              | 723.554    | 723.554      | 723.554   |
| CV (Cal/molK)    | 263.422                                      | 2.981        | 2.981     | 2.981     | 2.981                                  | 266.403              | 266.403    | 266.403      | 266.403   |
| S (Cal/molK)     | 356.557                                      | 30.125       | 34.919    | 36.984    | 39.195                                 | 386.682              | 391.476    | 393.541      | 395.752   |
| model            | adduct (a.u.)                                |              |           |           | adduct - small+empty (a.u.)            |                      |            |              |           |
|                  | He                                           | Ne           | Ar        | Kr        | He                                     | Ne                   | Ar         | Kr           |           |
| E                | -3482.245                                    | -3608.220    | -4006.819 | -6230.462 | -0.002                                 | -0.004               | -0.013     | -0.043       |           |
| ZPE-corr (H/n)   | 1.087                                        | 1.087        | 1.088     | 1.087     | 0.001                                  | 0.000                | 0.001      | 0.001        |           |
| TD-E corr        | 1.155                                        | 1.154        | 1.155     | 1.155     | 0.002                                  | 0.001                | 0.002      | 0.002        |           |
| TD-H corr        | 1.156                                        | 1.155        | 1.156     | 1.156     | 0.001                                  | 0.000                | 0.001      | 0.001        |           |
| TD-G corr        | 0.981                                        | 0.977        | 0.983     | 0.982     | 0.010                                  | 0.008                | 0.015      | 0.015        |           |
| E+ZPE            | -3481.158                                    | -3607.133    | -4005.731 | -6229.374 | -0.001                                 | -0.004               | -0.012     | -0.042       |           |
| E+TD-E           | -3481.090                                    | -3607.065    | -4005.664 | -6229.307 | 0.000                                  | -0.003               | -0.012     | -0.041       |           |
| E+TD-H           | -3481.089                                    | -3607.064    | -4005.663 | -6229.306 | -0.001                                 | -0.004               | -0.013     | -0.042       |           |
| E+TD-G           | -3481.264                                    | -3607.243    | -4005.836 | -6229.479 | 0.008                                  | 0.004                | 0.001      | -0.028       |           |
| E-TD (Kcal/mol)  | 724.633                                      | 724.449      | 724.727   | 724.705   | 1.079                                  | 0.895                | 1.173      | 1.151        |           |
| CV (Cal/molK)    | 269.129                                      | 269.352      | 269.022   | 269.136   | 2.726                                  | 2.949                | 2.619      | 2.733        |           |
| S (Cal/molK)     | 367.895                                      | 375.418      | 364.093   | 365.715   | -18.787                                | -16.058              | -29.448    | -30.037      |           |
| model            | adduct - small+empty (kJ mol <sup>-1</sup> ) |              |           |           | BSSE-corrected (kJ mol <sup>-1</sup> ) |                      |            |              |           |
|                  | He                                           | Ne           | Ar        | Kr        | He                                     | Ne                   | Ar         | Kr           |           |
| E                | -4.9                                         | -11.0        | -35.3     | -113.9    | -0.4                                   | -5.3                 | -31.1      | -53.7        |           |
| ZPE-corr (H/n)   | 2.4                                          | 0.9          | 3.2       | 2.9       | <b>4.5</b>                             | <b>5.7</b>           | <b>4.2</b> | <b>60.2</b>  |           |
| TD-E corr        | 4.5                                          | 3.7          | 4.9       | 4.8       |                                        |                      |            |              |           |
| TD-H corr        | 2.0                                          | 1.3          | 2.4       | 2.3       |                                        |                      |            |              |           |
| TD-G corr        | 25.5                                         | 21.3         | 39.2      | 39.8      |                                        |                      |            |              |           |
| E+ZPE            | -3.1                                         | -9.9         | -32.6     | -110.6    | 1.4                                    | -4.2                 | -28.4      | -50.4        |           |
| E+TD-E           | -1.0                                         | -7.0         | -31.0     | -108.6    | 3.5                                    | -1.3                 | -26.8      | -48.4        |           |
| E+TD-H           | -3.5                                         | -9.5         | -33.4     | -111.1    | 1.0                                    | -3.8                 | -29.2      | -50.9        |           |
| E+TD-G           | 20.0                                         | 10.5         | 3.3       | -73.6     | <b>24.5</b>                            | <b>16.2</b>          | <b>7.5</b> | <b>-13.4</b> |           |
| E-TD (Kcal/-mol) | 0.26                                         | 0.21         | 0.28      | 0.28      |                                        |                      |            |              |           |
| CV (Cal/molK)    | 0.65                                         | 0.70         | 0.63      | 0.65      |                                        |                      |            |              |           |
| S (Cal/molK)     | -4.49                                        | -3.84        | -7.04     | -7.18     |                                        |                      |            |              |           |

BSSE correction given as bold red numbers; BSSE corrected Gibbs free energies highlighted in yellow.

**Table S4.** Grimme-D3 dispersion energy parts for  $[(5\text{-Ph}_2\text{B-xan-4-})_3\text{Si}\cdot(\text{Ng})]^{(+)}(\text{H})$ 

| model          | E(dis) a.u. | E(dis) kJ mol <sup>-1</sup> | $\Delta\text{E}(\text{disp})$ kJ mol <sup>-1</sup> |
|----------------|-------------|-----------------------------|----------------------------------------------------|
| neutral        | -0.4890     | -1283.8                     |                                                    |
| dead-end       | -0.4819     | -1265.1                     |                                                    |
| active         | -0.4842     | -1271.4                     |                                                    |
| no_He          | -0.4834     | -1269.2                     |                                                    |
| no_Ne          | -0.4836     | -1269.7                     |                                                    |
| no_Ar          | -0.4834     | -1269.2                     |                                                    |
| no_Kr          | -0.4865     | -1277.2                     |                                                    |
| <b>average</b> |             | <b>-1270.5</b>              |                                                    |
| He             | -0.4863     | -1276.8                     | -6.3                                               |
| Ne             | -0.4895     | -1285.1                     | -14.6                                              |
| Ar             | -0.5037     | -1322.5                     | -52.0                                              |
| Kr             | -0.5160     | -1354.8                     | -84.3                                              |

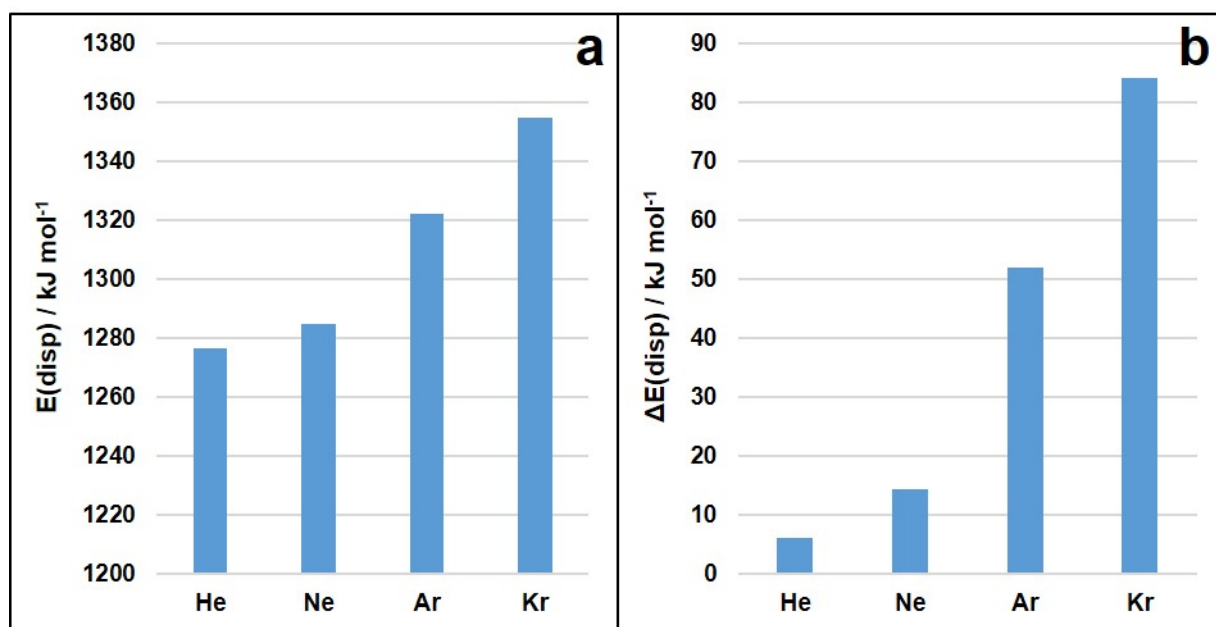**Figure S1.** Grimme-D3 dispersion energy parts for  $[(5\text{-Ph}_2\text{B-xan-4-})_3\text{Si}\cdot(\text{Ng})]^{(+)}(\text{H})$ : (a) absolute values, (b) the averaged value of all calculations including only the active ligand systems (active state and "no Ng states") was subtracted from the respective models including Ng atoms to quantify the relevance of dispersion between ligand system and Ng atoms, see Table S4. Signs are inverted for display purposes.

**Table S5.** Estimation of the energy requirements for the hydride abstraction step<sup>§</sup>

| model           | start (2a) | active (2c) | <sup>(+)</sup> CPh <sub>3</sub> | CPh <sub>3</sub> H | 2a + <sup>(+)</sup> CPh <sub>3</sub> | 2c + CPh <sub>3</sub> H | diff. (a.u.) | diff. (kJ/mol) |
|-----------------|------------|-------------|---------------------------------|--------------------|--------------------------------------|-------------------------|--------------|----------------|
| E               | -3480.2067 | -3479.3940  | -732.6887                       | -733.4911          | -4212.8955                           | -4212.8852              | 0.0103       | 27.0           |
| ZPE-corr (H/n)  | 1.0937     | 1.0878      | 0.2818                          | 0.2919             | 1.3756                               | 1.3797                  | 0.0041       | 10.7           |
| TD-E corr       | 1.1581     | 1.1523      | 0.2963                          | 0.3069             | 1.4544                               | 1.4592                  | 0.0048       | 12.5           |
| TD-H corr       | 1.1590     | 1.1532      | 0.2973                          | 0.3079             | 1.4563                               | 1.4611                  | 0.0048       | 12.5           |
| TD-G corr       | 0.9945     | 0.9882      | 0.2396                          | 0.2468             | 1.2341                               | 1.2349                  | 0.0008       | 2.2            |
| E+ZPE           | -3479.1130 | -3478.3063  | -732.4069                       | -733.1992          | -4211.5199                           | -4211.5055              | 0.0144       | 37.8           |
| E+TD-E          | -3479.0487 | -3478.2418  | -732.3924                       | -733.1842          | -4211.4411                           | -4211.4260              | 0.0151       | 39.5           |
| E+TD-H          | -3479.0477 | -3478.2408  | -732.3915                       | -733.1833          | -4211.4392                           | -4211.4241              | 0.0151       | 39.5           |
| E+TD-G          | -3479.2123 | -3478.4059  | -732.4491                       | -733.2444          | -4211.6614                           | -4211.6502              | 0.0111       | 29.2           |
| E-TD (Kcal/mol) | 726.7000   | 723.0560    | 185.9580                        | 192.5900           | 912.6580                             | 915.6460                | 2.9880       | 12.5           |
| CV (Cal/molK)   | 263.0360   | 262.7270    | 59.0850                         | 60.0450            | 322.1210                             | 322.7720                | 0.6510       | 2.7            |
| S (Cal/molK)    | 346.3110   | 347.3480    | 121.3310                        | 128.5660           | 467.6420                             | 475.9140                | 8.2720       | 34.6           |

<sup>§</sup> b3pw91-D3/6-31+G\* level of theory including dispersion *and* solvation (CH<sub>2</sub>Cl<sub>2</sub>)

**Table S6.** Relevant bond distances (in Å) of [(5-Ph<sub>2</sub>B-*xan*-4-)<sub>3</sub>Si·Ng]<sup>+</sup> (**2d-g**)

| Si        | r <sub>C(Ng)</sub> | r <sub>C(Si)</sub> | Σr <sub>C</sub> | r <sub>V(Ng)</sub> | r <sub>V(Si)</sub> | Σr <sub>V</sub> | Δr(Si)  | <b>d(Ng-Si)</b> | %(C,V)  |        |
|-----------|--------------------|--------------------|-----------------|--------------------|--------------------|-----------------|---------|-----------------|---------|--------|
| <b>He</b> | 0.46               | 1.16               | 1.62            | 1.43               | 2.19               | 3.62            | 2.00    | <b>3.149</b>    | 76.5    |        |
| <b>Ne</b> | 0.67               | 1.16               | 1.83            | 1.58               | 2.19               | 3.77            | 1.94    | <b>3.119</b>    | 66.4    |        |
| <b>Ar</b> | 0.96               | 1.16               | 2.12            | 1.83               | 2.19               | 4.02            | 1.90    | <b>2.890</b>    | 40.5    |        |
| <b>Kr</b> | 1.17               | 1.16               | 2.33            | 2.25               | 2.19               | 4.44            | 2.11    | <b>2.707</b>    | 17.9    |        |
| B         | r <sub>C(Ng)</sub> | r <sub>C(B)</sub>  | Σr <sub>C</sub> | r <sub>V(Ng)</sub> | r <sub>V(B)</sub>  | Σr <sub>V</sub> | Δr(B)   | <b>d(Ng-B)</b>  | %(C,V)  |        |
| <b>He</b> | 0.46               | 0.85               | 1.31            | 1.43               | 1.91               | 3.34            | 2.03    | <b>3.323</b>    | 99.2    |        |
| <b>Ne</b> | 0.67               | 0.85               | 1.52            | 1.58               | 1.91               | 3.49            | 1.97    | <b>3.332</b>    | 92.0    |        |
| <b>Ar</b> | 0.96               | 0.85               | 1.81            | 1.83               | 1.91               | 3.74            | 1.93    | <b>3.384</b>    | 81.5    |        |
| <b>Kr</b> | 1.17               | 0.85               | 2.02            | 2.25               | 1.91               | 4.16            | 2.14    | <b>3.379</b>    | 63.5    |        |
| O         | r <sub>C(Ng)</sub> | r <sub>C(O)</sub>  | Σr <sub>C</sub> | r <sub>V(Ng)</sub> | r <sub>V(O)</sub>  | Σr <sub>V</sub> | Δr(O)   | <b>d(Ng-O)</b>  | %(C,V)  |        |
| <b>He</b> | 0.46               | 0.63               | 1.09            | 1.43               | 1.50               | 2.93            | 1.84    | <b>3.543</b>    | 133.3   |        |
| <b>Ne</b> | 0.67               | 0.63               | 1.30            | 1.58               | 1.50               | 3.08            | 1.78    | <b>3.535</b>    | 125.6   |        |
| <b>Ar</b> | 0.96               | 0.63               | 1.59            | 1.83               | 1.50               | 3.33            | 1.74    | <b>3.428</b>    | 105.7   |        |
| <b>Kr</b> | 1.17               | 0.63               | 1.80            | 2.25               | 1.50               | 3.75            | 1.95    | <b>3.340</b>    | 79.0    |        |
| d(E,B)    | Si-B1              | Si-B1              | Si-B1           | B1-B2              | B1-B3              | B2-B3           | ∅(Si-B) | ∅(B-B)          | Δ(Si-B) | Δ(B-B) |
| act       | 4.883              | 4.882              | 4.883           | 5.659              | 5.664              | 5.660           | 4.883   | 5.661           |         |        |
| <b>He</b> | 4.893              | 4.891              | 4.895           | 5.694              | 5.699              | 5.697           | 4.893   | 5.697           | 0.01    | 0.04   |
| <b>Ne</b> | 4.892              | 4.891              | 4.895           | 5.706              | 5.705              | 5.706           | 4.893   | 5.705           | 0.01    | 0.04   |
| <b>Ar</b> | 4.877              | 4.876              | 4.877           | 5.742              | 5.736              | 5.738           | 4.877   | 5.739           | -0.01   | 0.08   |
| <b>Kr</b> | 4.819              | 4.820              | 4.818           | 5.674              | 5.674              | 5.675           | 4.819   | 5.674           | -0.06   | 0.01   |

r<sub>C</sub> or r<sub>V</sub> is the molecular single bond covalent or van der Waals radius as listed in the webelements page (<https://www.webelements.com/>), Δr is the difference between covalent and van der Waals radius. d(Ng-Si/B/O) is the DFT distance after structural relaxation (in bold, b3pw91-D3/6-31+G\* level of theory). %(C,V) is the relative position of the DFT atom-atom distance within the range spanned by the difference between sum of covalent radii and van der Waals radii, i.e. a %(C,V) value larger than 100% indicates no interaction, a %(C,V) value between 50-100% a rather weak electrostatic interaction, and a %(C,V) value below 50% a polarized interaction with non-negligible covalent bond contributions.



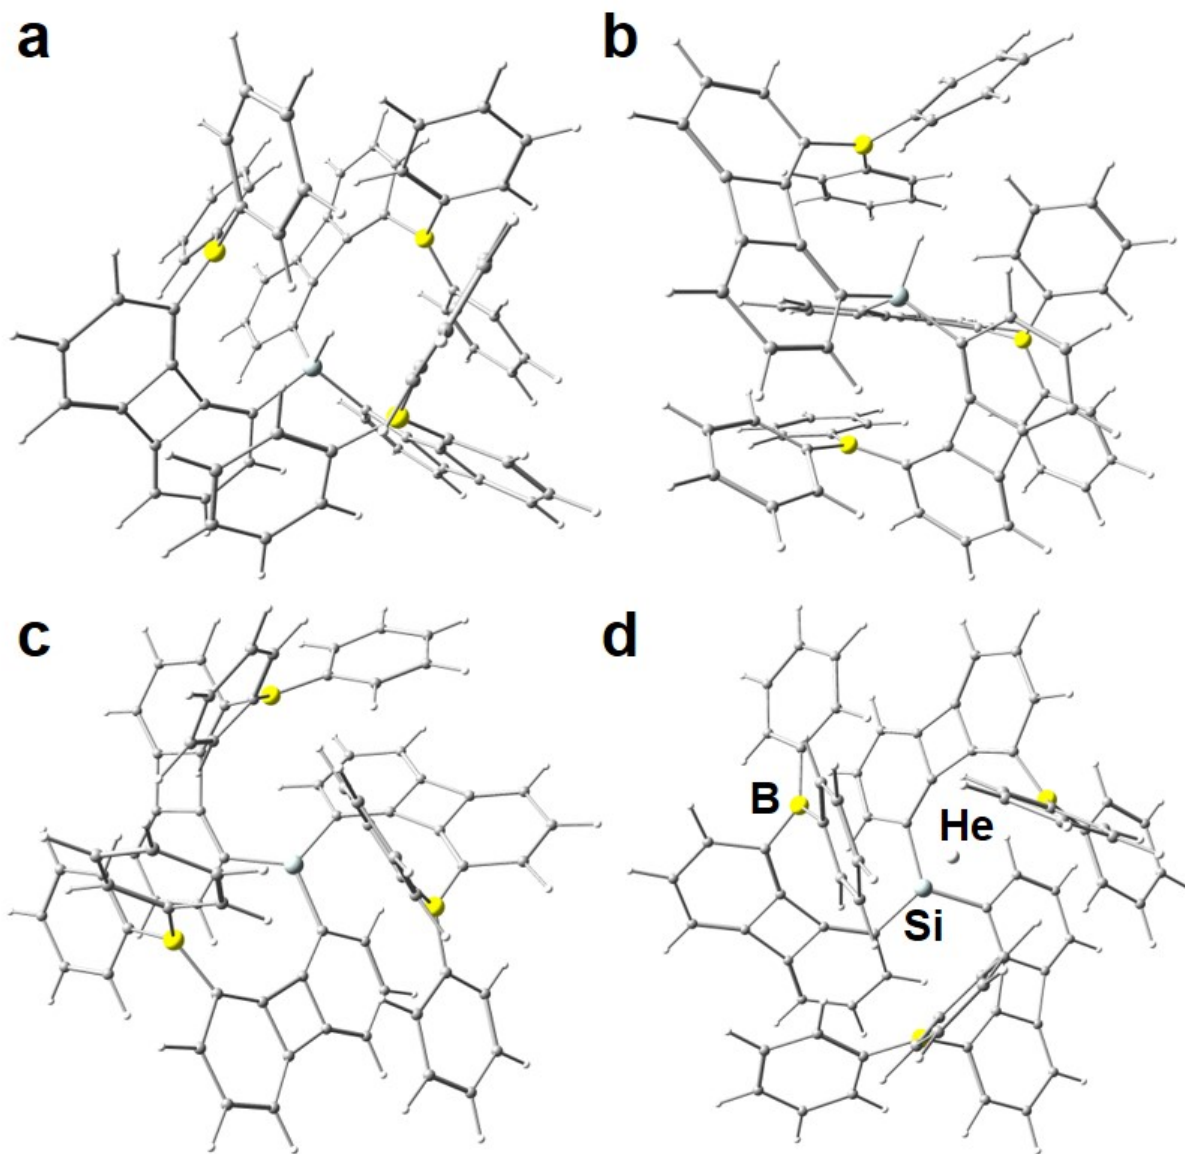

**Figure S2.** Relaxed gas-phase geometries of (a) the neutral starting state  $[(5\text{-Ph}_2\text{B-bip-4-})_3\text{Si}]\text{H}$  in the preferred orientation, (b) Neutral starting state  $[(5\text{-Ph}_2\text{B-bip-4-})_3\text{Si}]\text{H}$  in the unfavorable orientation, (c) Active state  $[(5\text{-Ph}_2\text{B-bip-4-})_3\text{Si}]^+$ , (d) He-adduct.  $[(5\text{-Ph}_2\text{B-bip-4-})_3\text{Si}\cdot\text{He}]^+$ .

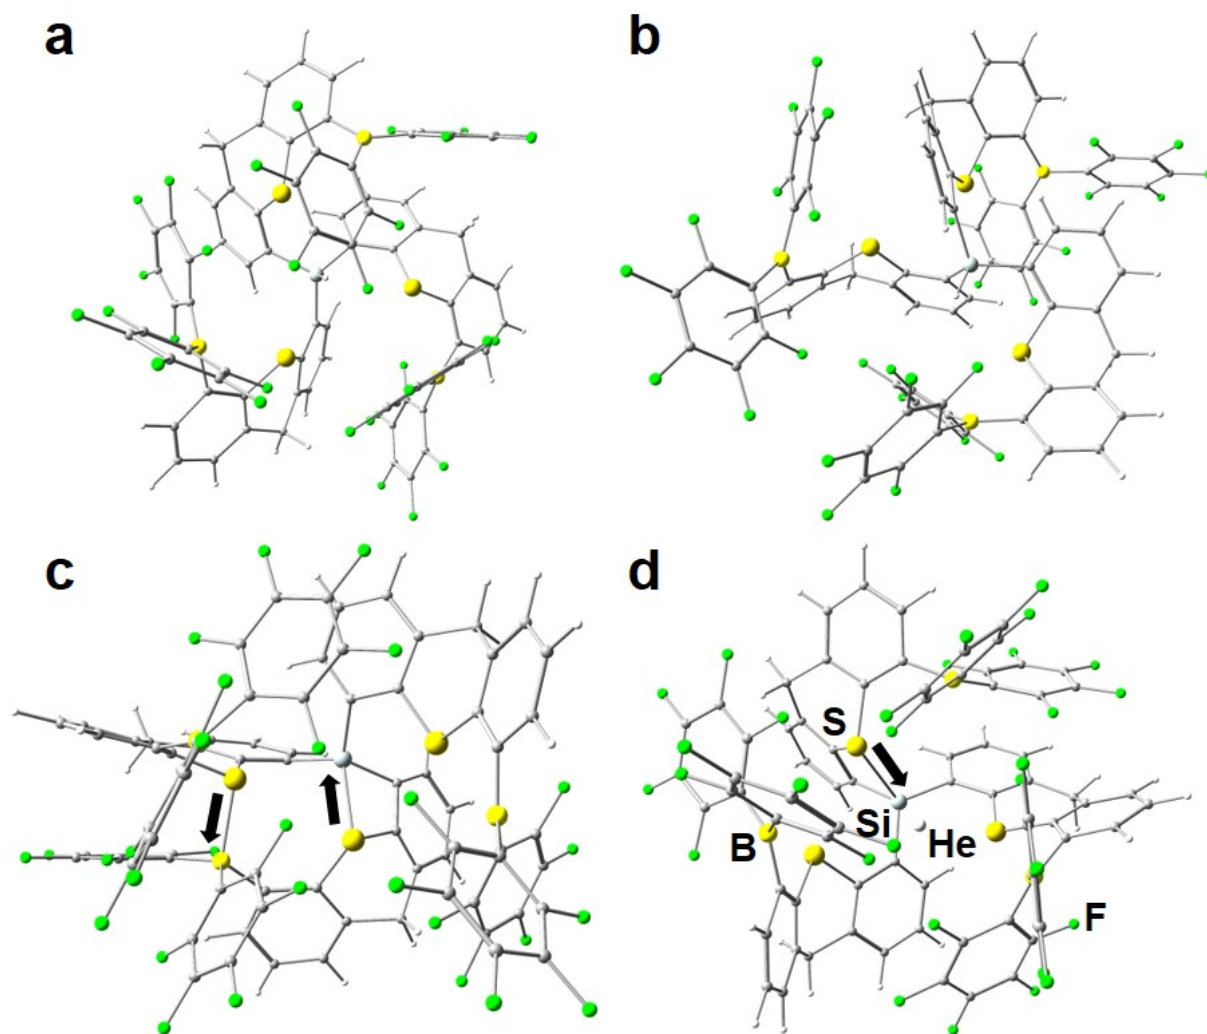

**Figure S3.** Relaxed gas-phase geometries of (a) the neutral starting state  $[(5\text{-Ph}_2\text{B-}txn\text{-}4\text{-})_3\text{Si}]\text{H}$  in the preferred orientation, (b) Neutral starting state  $[(5\text{-Ph}_2\text{B-}txn\text{-}4\text{-})_3\text{Si}]\text{H}$  in the unfavorable orientation, (c) Active state  $[(5\text{-Ph}_2\text{B-}txn\text{-}4\text{-})_3\text{Si}]^+$ , which is quenched by a short  $\text{S}\cdots\text{Si}$  ( $d(\text{S},\text{Si}) = 2.360 \text{ \AA}$ ) and a short  $\text{S}\cdots\text{B}$  ( $d(\text{S},\text{B}) = 2.162 \text{ \AA}$ ) interaction, (d) He-adduct  $[(5\text{-Ph}_2\text{B-}txn\text{-}4\text{-})_3\text{Si}\cdot\text{He}]^+$  Unfavorable Lewis acid Lewis base contacts are highlighted by black arrows.

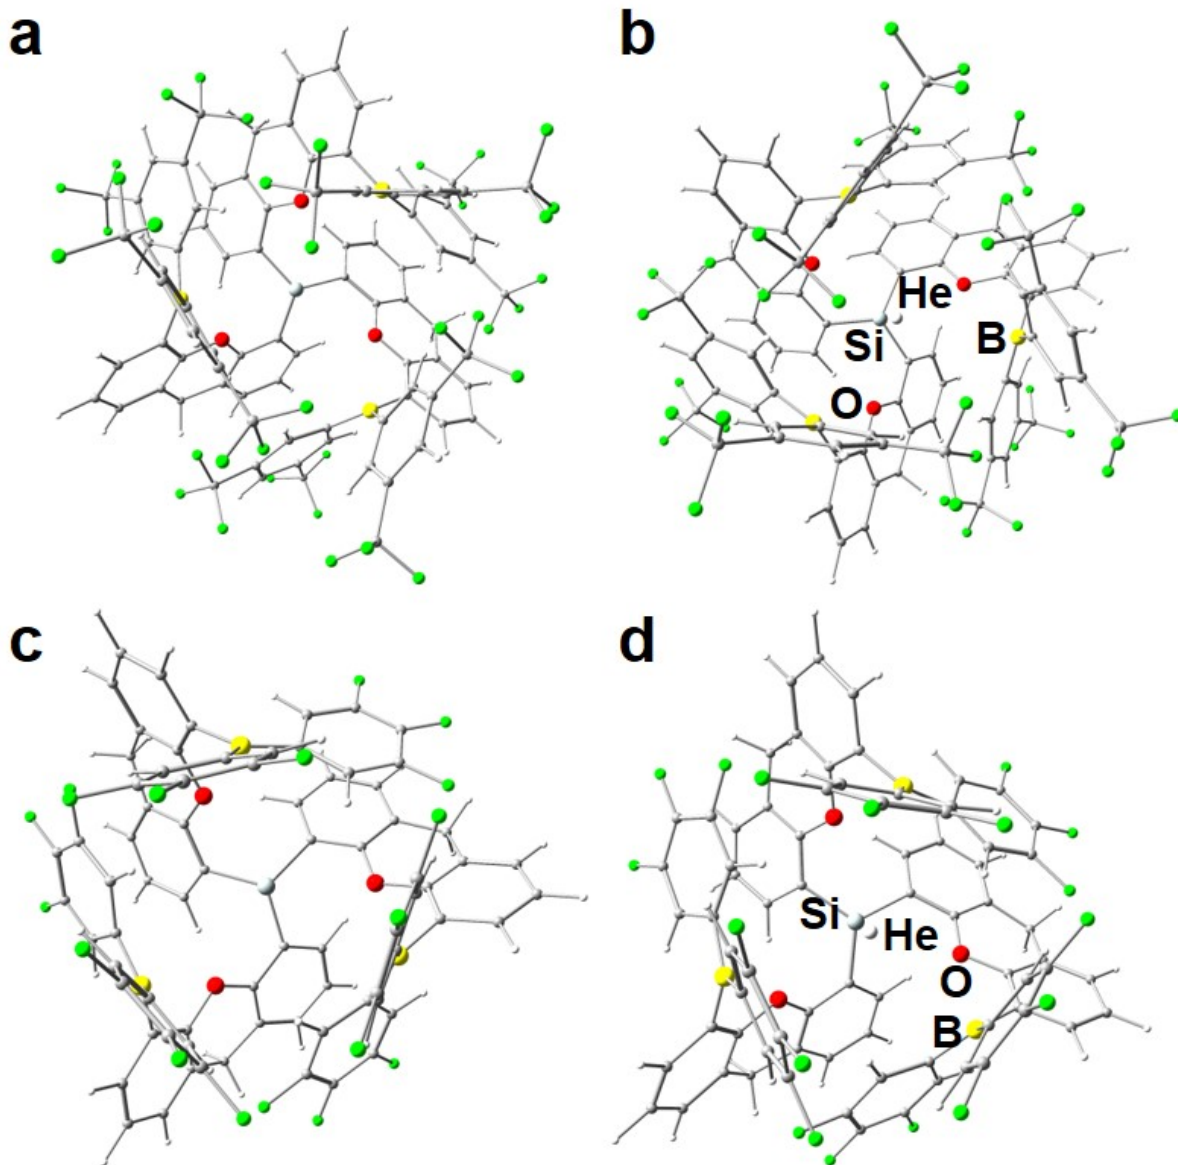

**Figure S4.** Relaxed gas-phase geometries of  $[(5-R_2B-xan-4-)_3Si]^+$  variants. (a)  $R = C_6H_3(m-CF_3)_2$ ; active state in the preferred orientation, (b) Corresponding  $[(5-R_2B-xan-4-)_3Si \cdot He]^+$  He adduct, (c)  $R = C_6H_2F_3$ ; active state in the preferred orientation, (d) Corresponding He adduct.

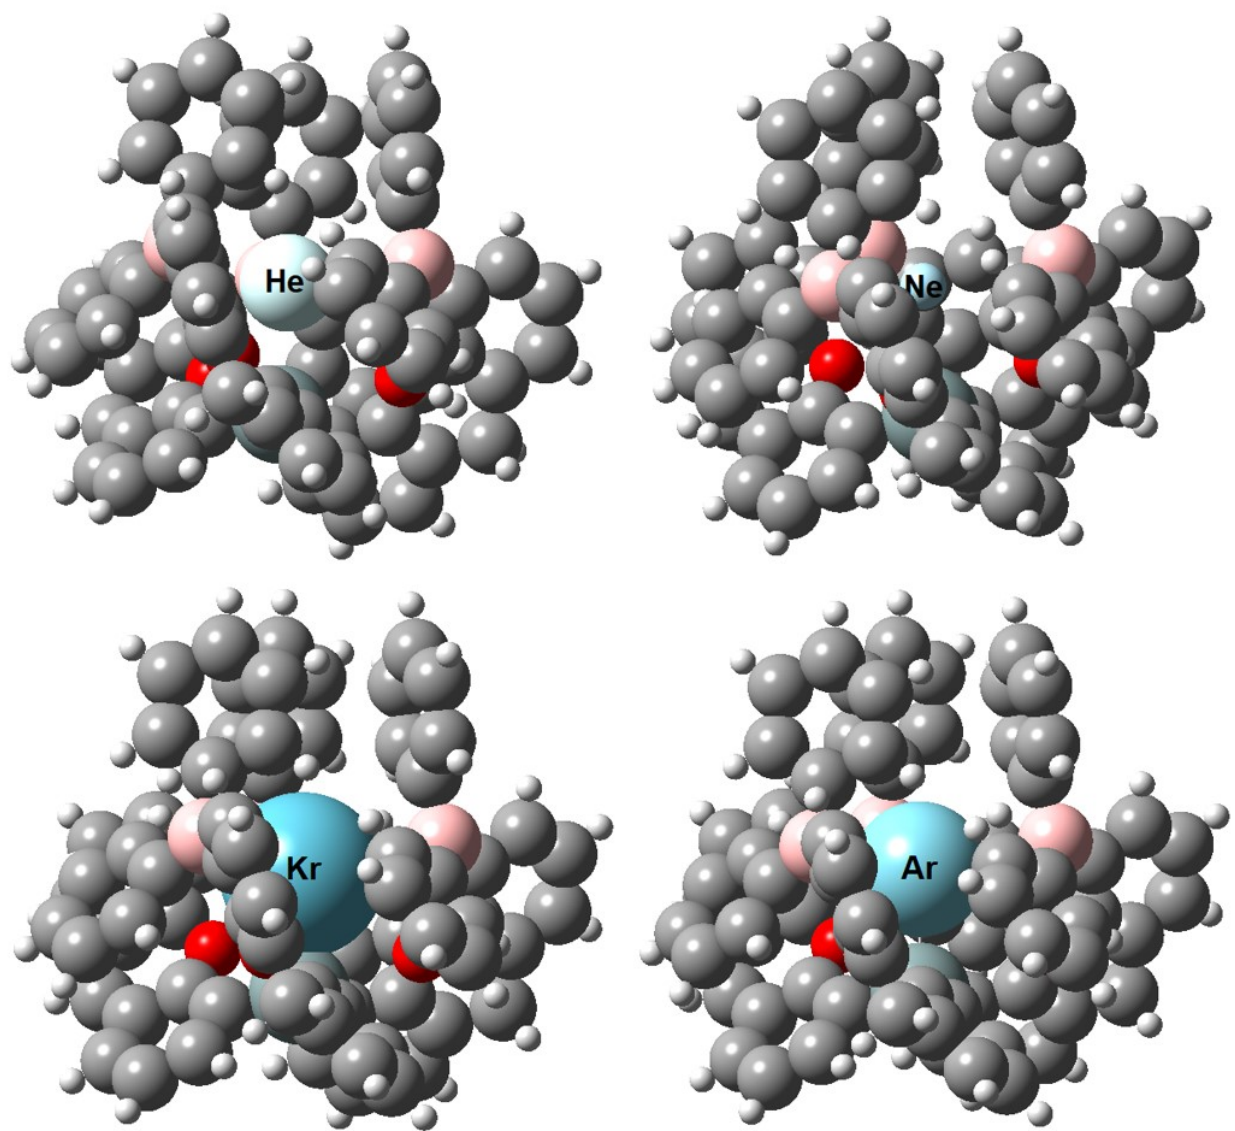

**Figure S5.** Van der Waals representation of the  $[(5\text{-Ph}_2\text{B-xan-4-})_3\text{Si}\cdot\text{Ng}]^+$  adducts (**2d-g**). VdW-radii used as implemented in GaussView3. Color code: Si (light gray), O (red), B (yellow), Ng (light to deep blue).

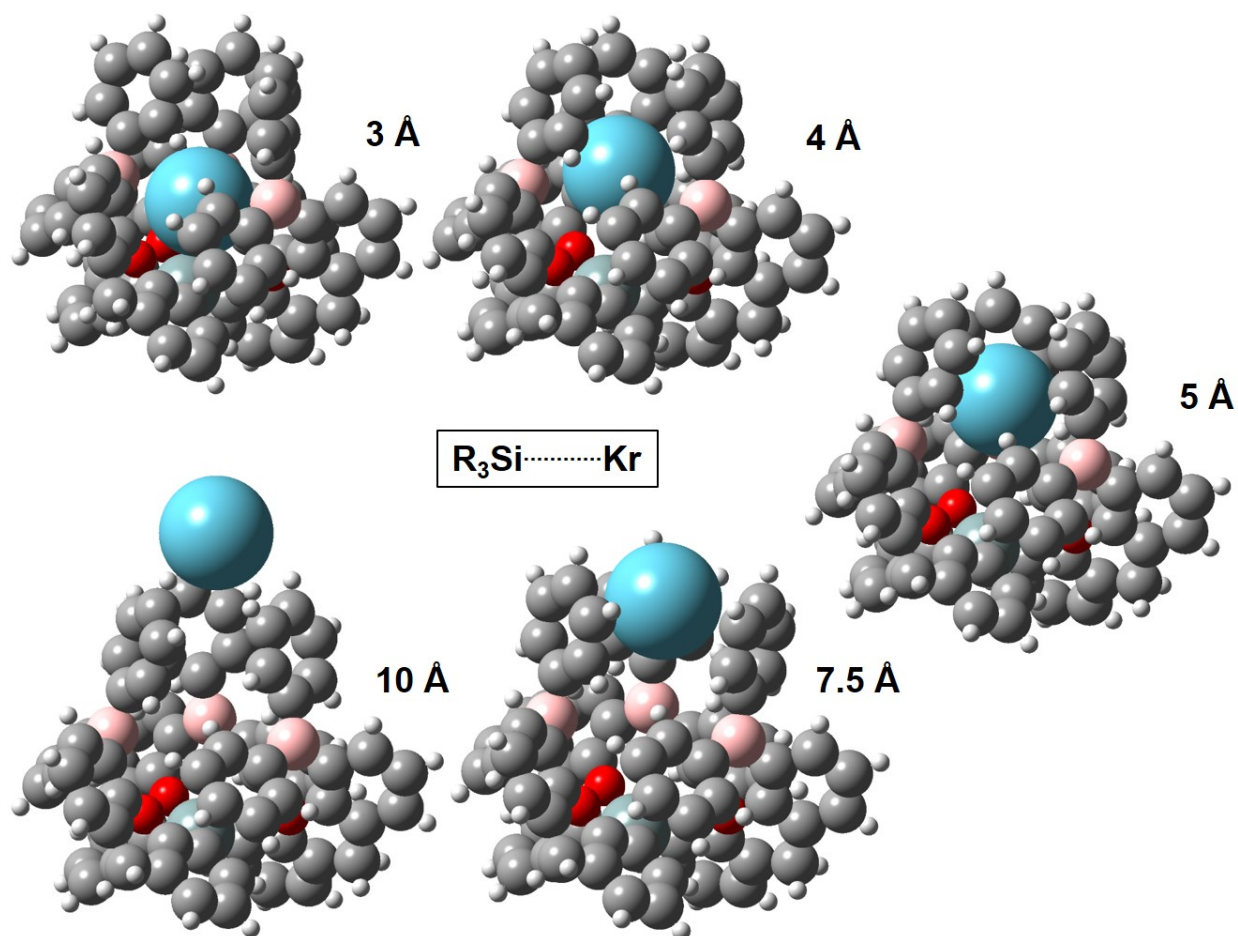

**Figure S6.** Si···Kr distance constrained relaxed gas-phase geometries of  $[(5\text{-Ph}_2\text{B-xan-4-})_3\text{Si}\cdot\text{Kr}]^+$  (potential energy scan of **2g**): Van der Waals representation. VdW-radii used as implemented in GaussView3. Color code: Si (light gray), O (red), B (yellow), Kr (deep blue).

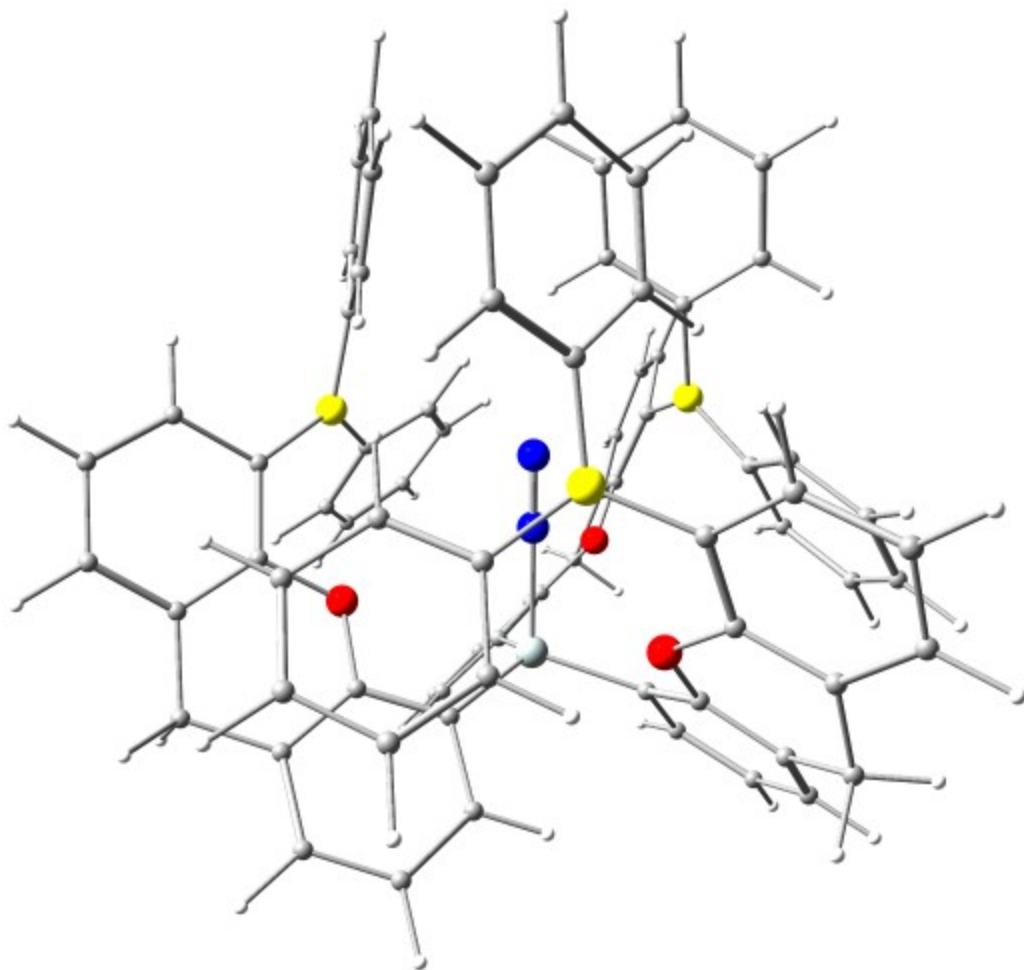

**Figure S7.** Relaxed gas-phase geometry of  $[(5\text{-Ph}_2\text{B-xan-4-})_3\text{Si}\cdot\text{N}_2]^+$ .  $\text{N}_2$ -adduct formation is energetically favored by  $-74.7 \text{ kJ mol}^{-1}$  ( $\Delta E$ ) and thermodynamically by  $-53.5 \text{ kJ mol}^{-1}$  ( $\Delta G$ ). Both values are corrected for BSSE ( $7.4 \text{ kJ mol}^{-1}$ ).

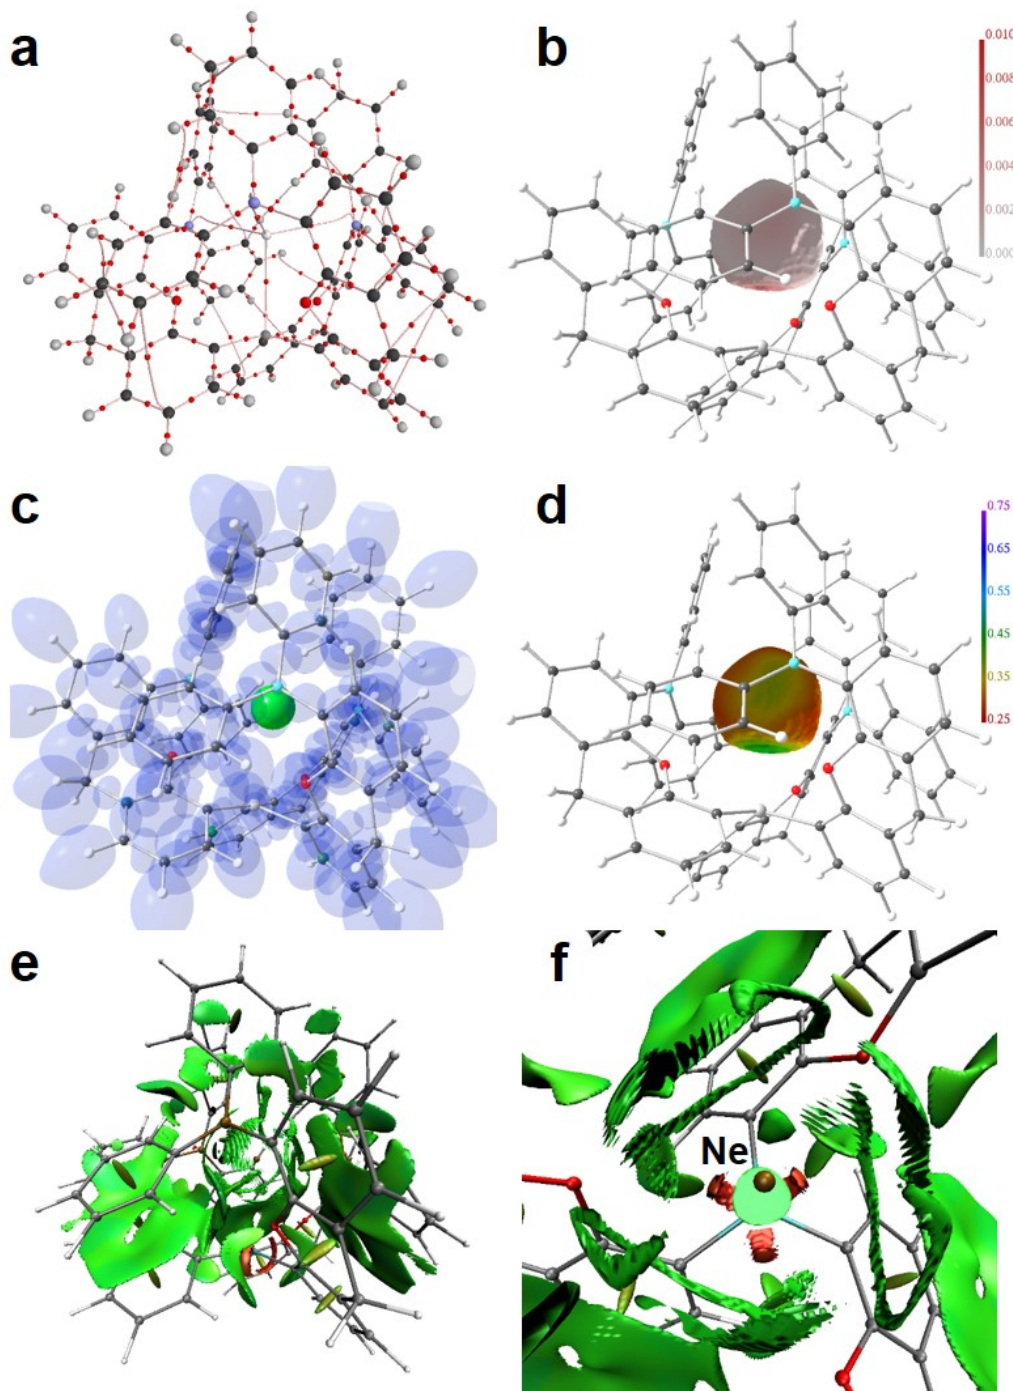

**Figure S8.** RSBI analysis of  $[(5\text{-Ph}_2\text{B-xan-4-})_3\text{Si}\cdot\text{Ne}]^+$  (**2e**) (a) AIM bond paths motif, (b) ED distribution (in a.u.) mapped on the AIM atomic basin of Ne, (c) ELI-D localization domain representation at an *iso*-value of 1.35, (d) ELI-D distribution mapped on the Ne ELI-D bonding basin, (e) NCI *iso*-surface at  $s(\mathbf{r}) = 0.5$ , (f) Magnification of the binding site; top view.

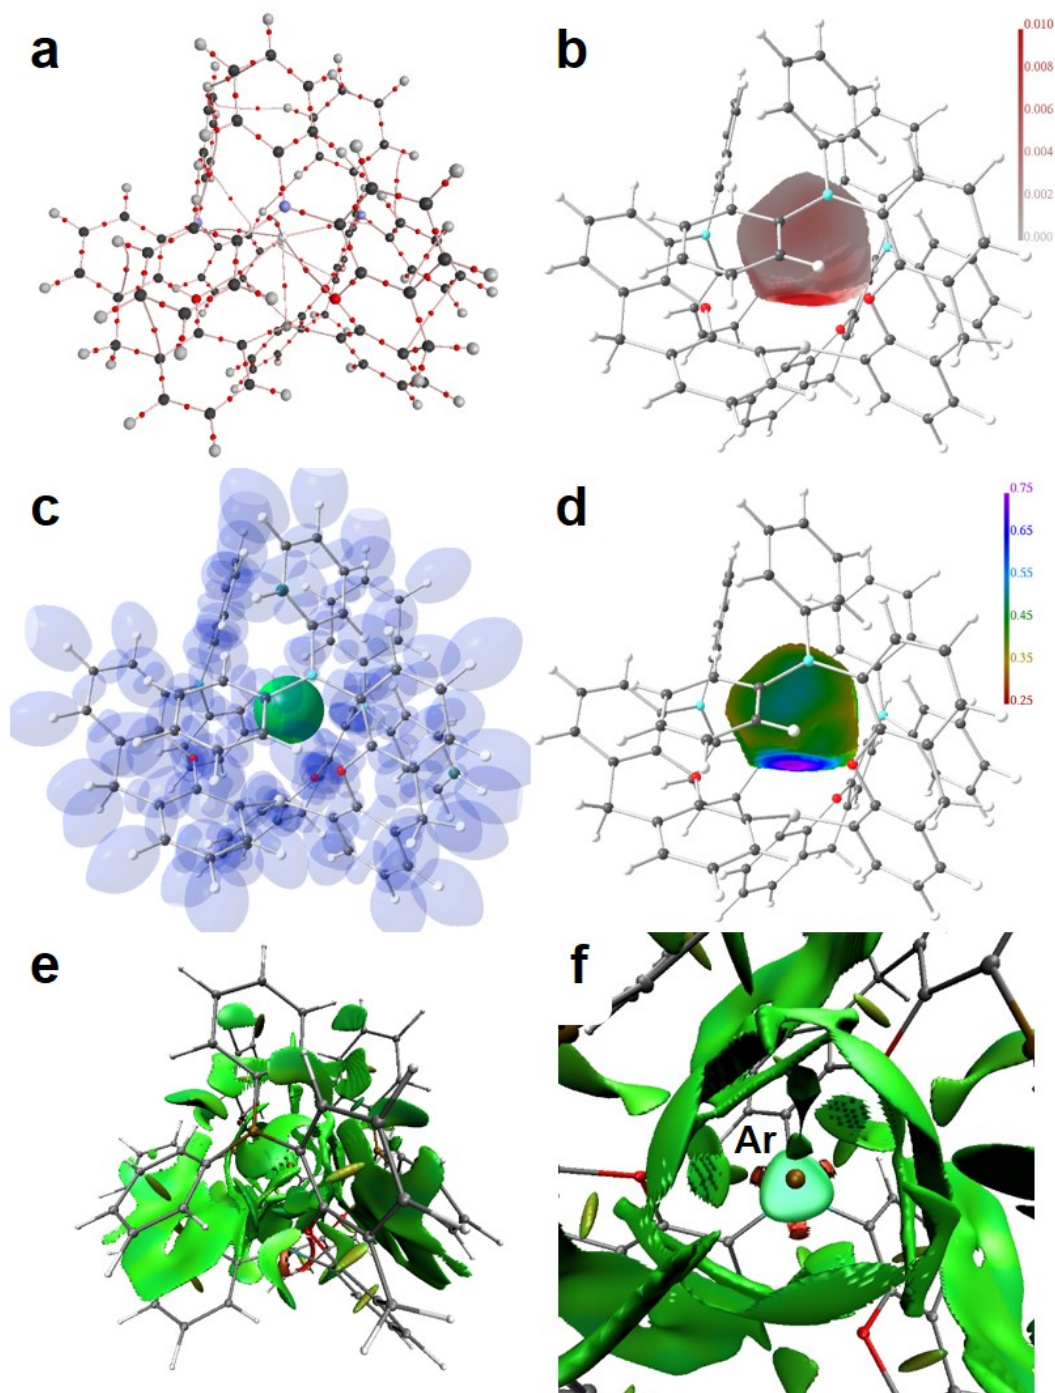

**Figure S9.** RSBI analysis of  $[(5\text{-Ph}_2\text{B-xan-4-})_3\text{Si}\cdot\text{Ar}]^+$  (**2f**): (a) AIM bond paths motif, (b) ED distribution (in a.u.) mapped on the AIM atomic basin of Ar, (c) ELI-D localization domain representation at an *iso*-value of 1.35, (d) ELI-D distribution mapped on the Ar ELI-D bonding basin, (e) NCI *iso*-surface at  $s(\mathbf{r}) = 0.5$ , (f) Magnification of the binding site; top view.



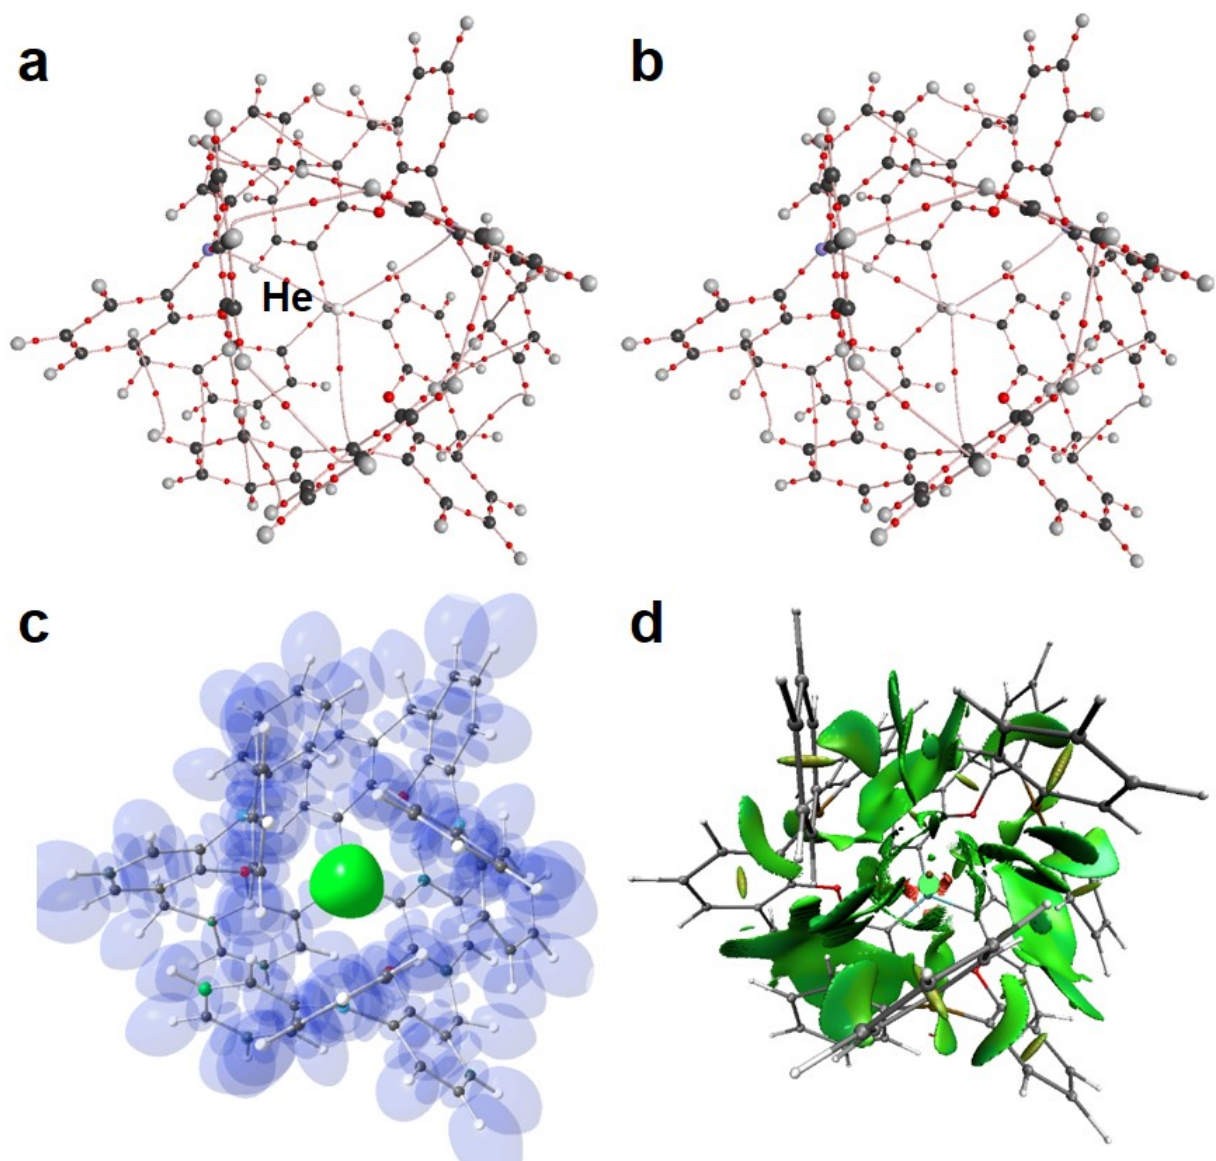

**Figure S10.** RSBI analysis of  $[(5\text{-Ph}_2\text{B-xan-4-})_3\text{Si}\cdot\text{He}]^+$  (**2d**): Top view. (a) AIM bond paths motif, (b) Virial field paths motif, (c) ELI-D localization domain representation at an *iso*-value of 1.35, (d) NCI *iso*-surface at  $s(\mathbf{r}) = 0.5$ .

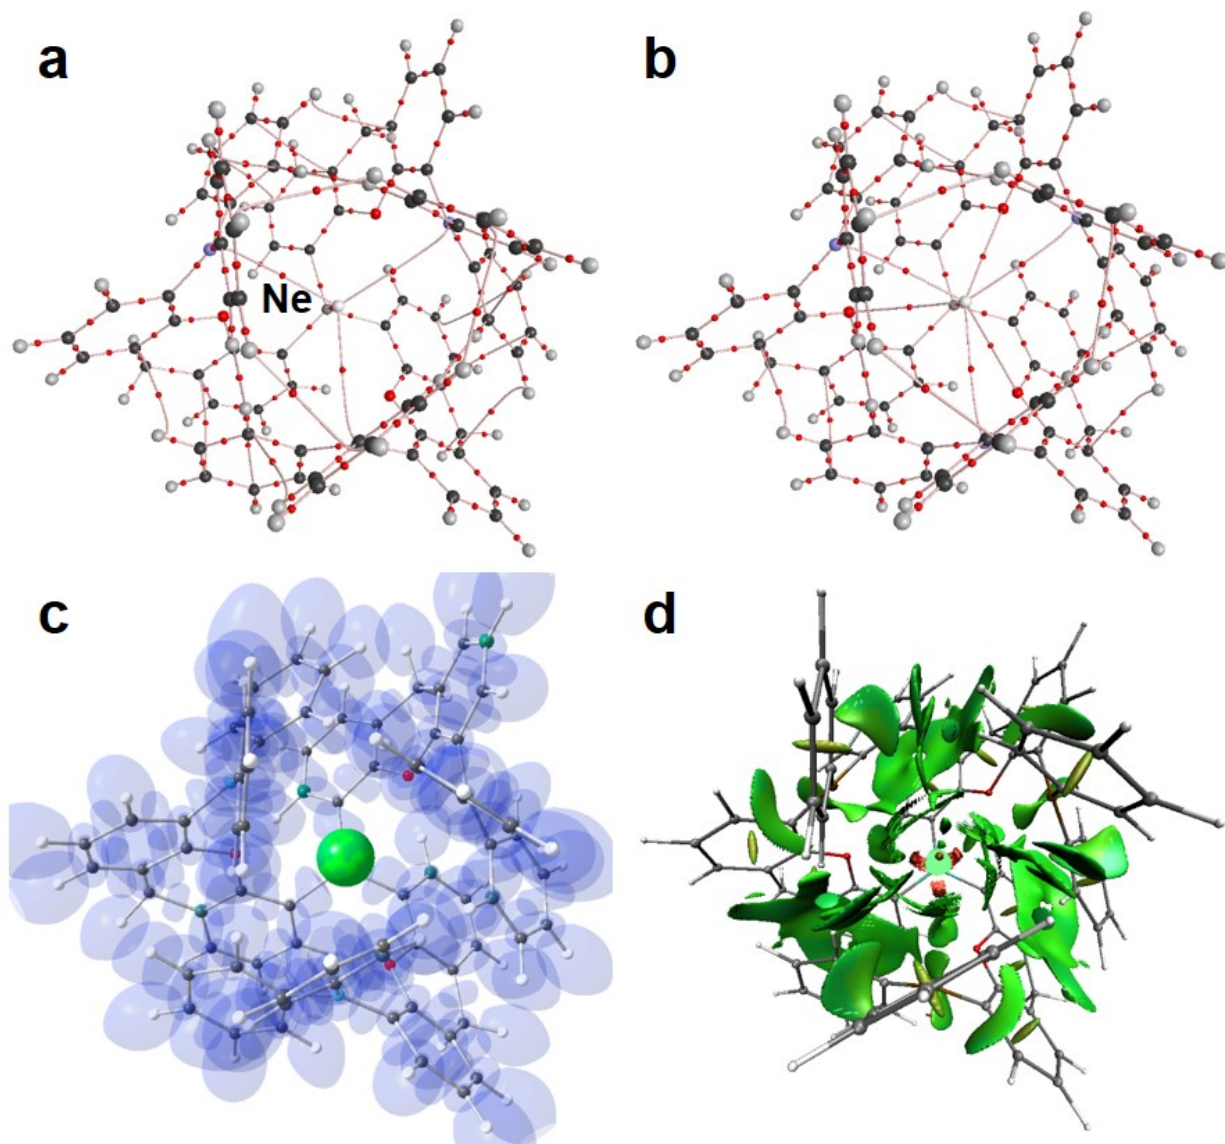

**Figure S11.** RSBI analysis of  $[(5\text{-Ph}_2\text{B-xan-4-})_3\text{Si}\cdot\text{Ne}]^+$  (**2e**): Top view. (a) AIM bond paths motif, (b) Virial field paths motif, (c) ELI-D localization domain representation at an *iso*-value of 1.35, (d) NCI *iso*-surface at  $s(\mathbf{r}) = 0.5$ .

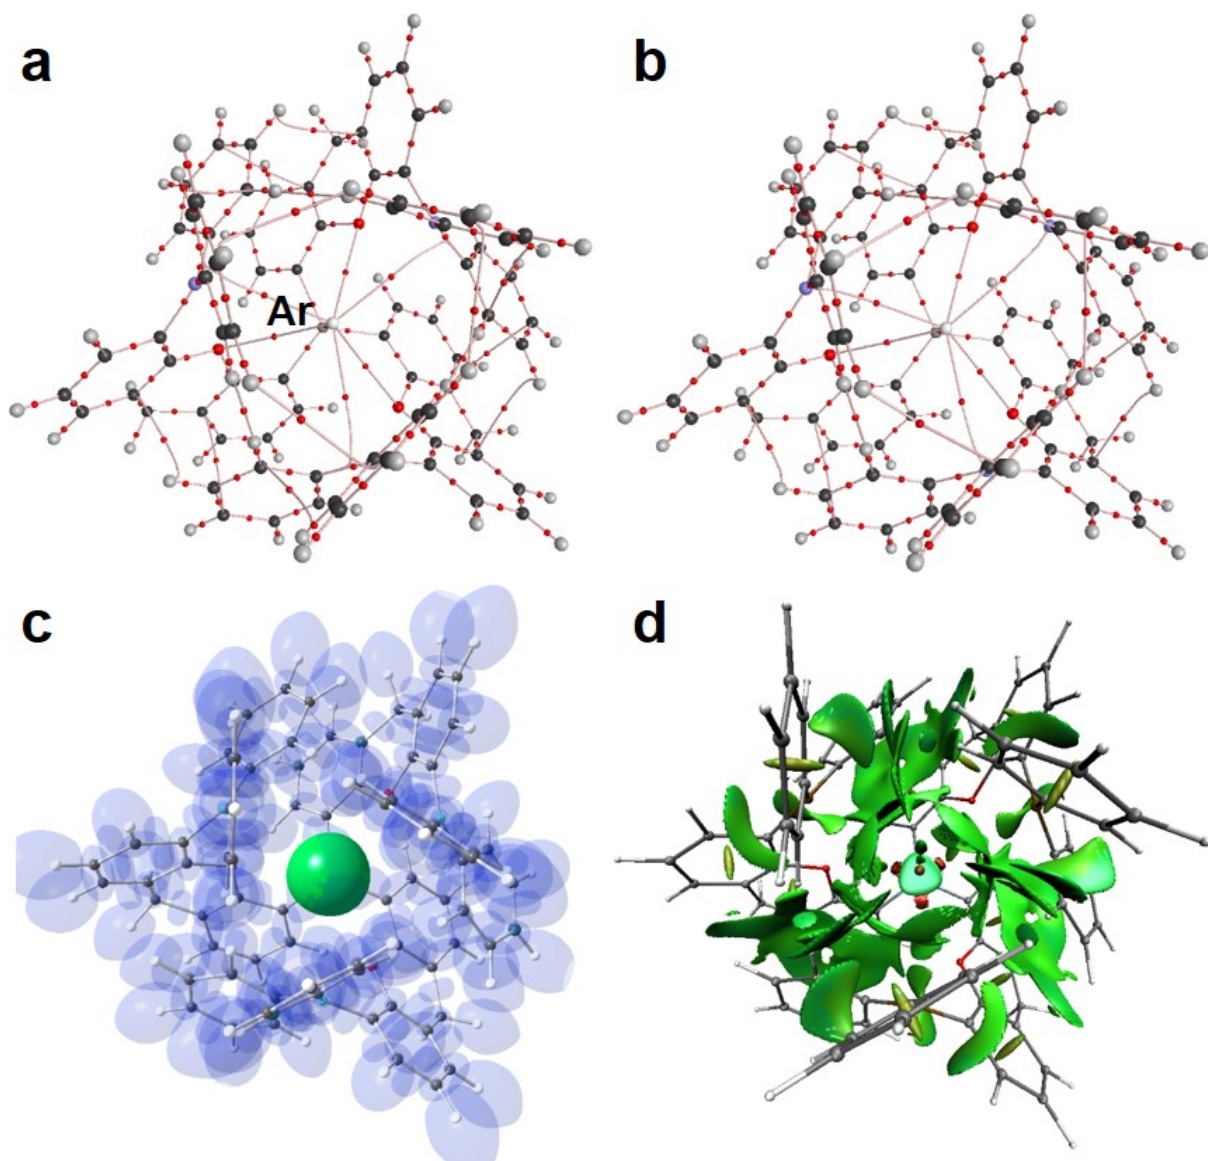

**Figure S12.** RSBI analysis of  $[(5\text{-Ph}_2\text{B-xan-4-})_3\text{Si}\cdot\text{Ar}]^+$  (**2f**): Top view. (a) AIM bond paths motif, (b) Virial field paths motif, (c) ELI-D localization domain representation at an *iso*-value of 1.35, (d) NCI *iso*-surface at  $s(\mathbf{r}) = 0.5$ .

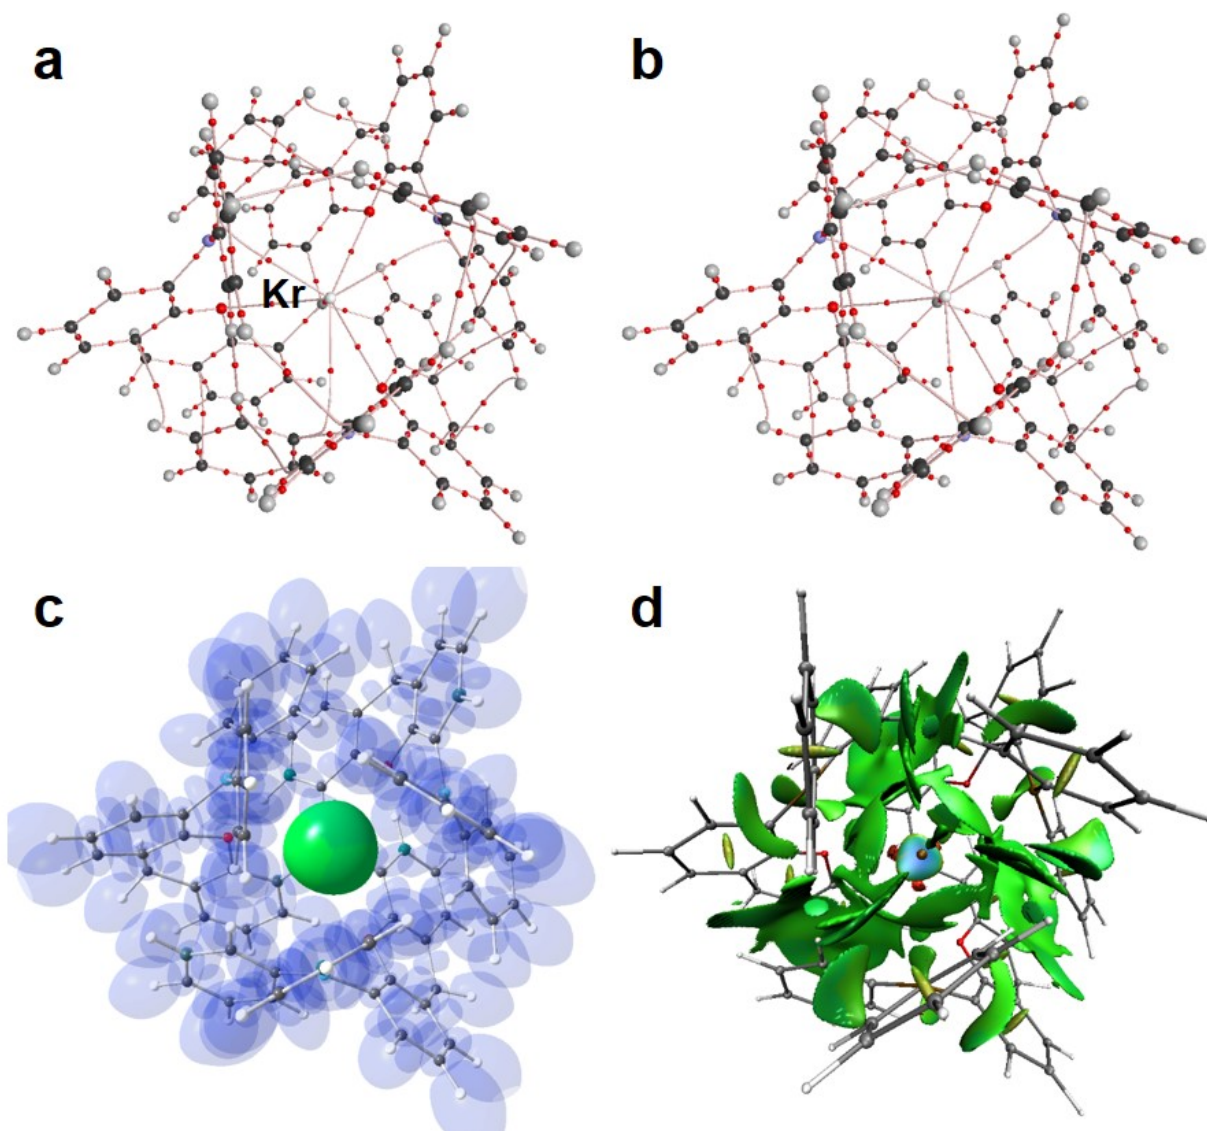

**Figure S13.** RSBI analysis of  $[(5\text{-Ph}_2\text{B-xan-4-})_3\text{Si}\cdot\text{Kr}]^+$  (**2g**): Top view. (a) AIM bond paths motif, (b) Virial field paths motif, (c) ELI-D localization domain representation at an *iso*-value of 1.35, (d) NCI *iso*-surface at  $s(\mathbf{r}) = 0.5$ .

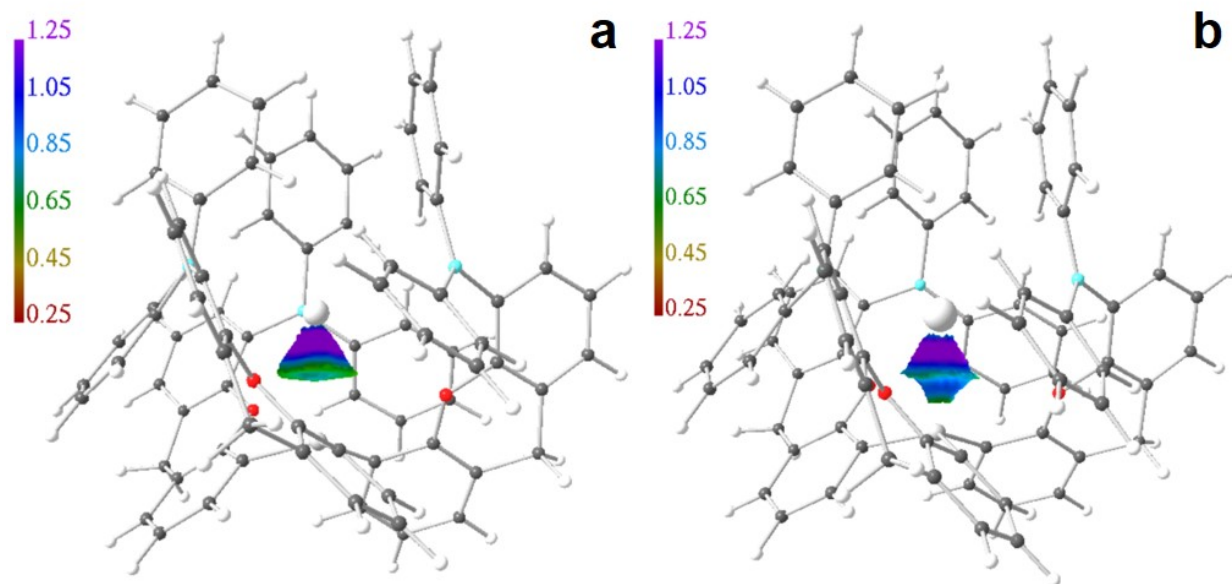

**Figure S14.** Disynaptic (bonding) ELI-D Ng–Si basins for  $[(5\text{-Ph}_2\text{B-xan-4-})_3\text{Si}\cdot\text{Ar}]^+$  (**2f**) and  $[(5\text{-Ph}_2\text{B-xan-4-})_3\text{Si}\cdot\text{Kr}]^+$  (**2g**).
